# Supplementary material for: On the phenology and seeding potential of sea-ice microalgal species
Source: Oxford University Press journal article supplement (doi:10.1525/elementa.2021.00029), 2022-01-01
Supplement: table_s2.xlsx [file table_s2.xlsx]

## Sheet: Sheet1
Supplementary table 2: Distribution of microalgal species composition, expressed in cells/ml. Sympagic communities were distinguished
in surface, interior and bottom ice communities, in various months in 2014 and 2016
Algal Class	Species	surface		interior		bottom
		2014-10-14	2014-12-06	2014-10-14	2014-12-06	2016-05-05	2014-12-06
Dinophyceae	Amphidinium sp.			400
	Gymnodinium sp.	80			1637	15245
	Heterocapsa sp.		1320	8100	600
	Katodinium sp.
	Peridiniales					250
Diatomophyceae	Amphiprora kufferathii (p)		240				938598
	Berkeleya (p)	200	2160	1000	5000		111803618
	Chaetoceros sp. (c)	8380		46600	8520
	Corethron sp. (c)	40
	Coscinodicophyceae (c)					16835
	Dactyliosolen (c)				280
	Eucampia sp. (c)	40			280
	Fragillariopsis sp. (p)	300	40	3800	443152	75400	4.84653e+07
	N. longissima/C. closterium (p)	40	80	200	40
	Navicula sp. (p)	9680	619136	1800	23980		165635
	Nitzschia spp. (p)	400	1000	7400	600		69451124
	Plagiotropus gausii (p)		40
	Pleurosigma sp. (p)						1731245
	Proboscia sp. (p)			240
	Pseudo_nitzschia (p)					25300
	Thalassiosira sp. (c)
Cryptophyceae	Cryptophytes	15364		4640	2793	8418	419008
Prymnesiophyceae	Phaeocystis antarctica	16760	41707	78960	30960		139669
	Chrysochromulina
Prasinophyceae	Pyramimonas sp.					42088
Bold numbers: top 10% of total cell number. p: pennate diatom; c: centric diatom
