# Supplementary material for: On the phenology and seeding potential of sea-ice microalgal species
Source: Oxford University Press journal article supplement (doi:10.1525/elementa.2021.00029), 2022-01-01
Supplement: table_s4.xlsx [file table_s4.xlsx]

## Sheet: paper
Supplementary table 4. Species composition in bottom sea ice (5 cm), under ice and in seawater in 2016. Algal abundance is presented as percentage of total cell numbers.
The list is not exhaustive, including only dominant species
		In ice			Under ice		Seawater - 5m
Class	Species	2016-10-03	2016-11-10	2016-11-15	2016-11-09	2016-12-01	2016-12-02
Dinophyceae	Amphidinium ‗ 20 µm	< 1					< 1
	Gymnodiniales autotroof 5-20 µm	< 1	< 1		7.10479	1.42069	< 1
	Gymnodiniales autotroof ‗ 20 µm				3.69532		< 1
	Gymnodiniales heterotroof 5-20 µm	< 1		1.15237	< 1	12.029	< 1
	Gymnodiniales heterotroof ‗ 20 µm				3.34266	40.624	< 1
	Gyrodinium ‗ 20 µm					1.51665	< 1
	Haslea ‗ 20 µm	< 1
	Katodinium ‗ 20 µm				< 1		< 1
	Peridiniales autotroof ‗ 20 µm	< 1		30.8214	13.416		< 1
Bacillariophyceae	Amphiprora ‗ 20 µm (p)			7.93795	< 1		< 1
	Coscinodiscophyceae 5-20 µm (c)	< 1
	Fragilariaceae ‗ 20 µm (p)	< 1		< 1
	Fragillariopsis 5-20 µm (p)	51.9905	6.31189	< 1	5.07506	6.6311
	Fragillariopsis ‗ 20 µm (p)	2.11201
	Pennates 5-20 µm	< 1					< 1
	Pennates ‗ 20 µm	11.5535	12.013	43.4746	55.9178	28.268
	Plagiotropis ‗ 20 µm (p)	< 1	< 1	< 1	< 1
	Pleurosigmataceae ‗ 20 µm (p)	< 1
	Pseudo-nitzschia ‗3-20 µm (p)			< 1
	Thalassiosira ‗ 20 µm (c)				< 1		< 1
Chlorophyceae	Chlorophyta 5-20 µm		38.4822	< 1	< 1		< 1
	Chlorophyta < 5 µm	9.45282	< 1		< 1	< 1	5.22067
	Unidentified flagellates 5-20 µm	< 1	40.3147	< 1	6.00582	6.1898	< 1
	Unidentified flagellates < 5 µm	11.816	1.22166	< 1	1.02078	1.35988	9.13617
Cryptophyceae	Cryptomonadales 5-20 µm				< 1		83.5307
	Cryptomonadales ‗ 20 µm						< 1
Prymnesiophyceae	Phaeocystis cel < 5 µm						< 1
	Phaeocystis flagellaat < 5 µm		< 1		< 1		< 1
Prasinophyceae	Pyramimonas 5-20 µm				< 1
p: pennate diatom; c: centric diatom
